# Supplementary material for: Blockade of Programmed Death 1 Augments the Ability of Human T Cells Engineered to Target NY-ESO-1 to Control Tumor Growth after Adoptive Transfer
Source: Oxford University Press journal article supplement (doi:10.1158/1078-0432.ccr-15-1070), 2015-08-31
Supplement: 10780432ccr151070-sup-149268_1_supp_3068834_nrw6xl.docx [file 10780432ccr151070-sup-149268_1_supp_3068834_nrw6xl.docx]

**Supplemental Table 1**

Literature search of publications where analyses of human TILs from cancer patients were performed was done. Tumor type and whether or not dysfunction of TILs was found to be reversible tabulated. Additionally, whether dysfunction involved defect in proximal TCR signaling or distal to that also recorded. “?” indicates that reversibility and/or localization of TIL dysfunction not stated in paper.

| Ref | Tumor | Reversibility | Proximal/distal | Other |
| --- | --- | --- | --- | --- |
| (1) | NHL | ? | Distal | Bcl-2/Bcl-xL downregulation |
| (2) | RCC | ? | Distal | Decreased proliferative capacity |
| (3) | Melanoma | Rev | Distal | Downstream genetic changes |
| (4) | Lung ca | Rev | Distal | Decreased NF-kappaB/NFAT translocation |
| (5) | Prostate ca | Rev | Distal | Arginase/NO synthase |
| (6) | Melanoma | ? | Proximal | PD1 upregulation |
| (7) | Ovarian ca | ? | Proximal | CD3z chain downregulation |
| (8) | Breast ca | Rev | ? | Decreased IL2R expression |
| (9) | Colorectal ca | Rev | Proximal | CD3z chain downregulation |
| (10) | Ovarian ca | Rev | Proximal | PD-1/Lag3 upregulation |
| (11) | Colorectal ca | ? | Proximal | CD3z chain downregulation |
| (12) | RCC | Rev | Distal | DGKa upregulation |
| (13) | Melanoma | Irrev | Proximal |  |
| (14) | Oral ca | ? | Proximal | CD3z chain downregulation |
| (15) | Lung adeno | ? | ? | Type 2 polarization |
| (16) | Cervical ca | Rev | ? | Type 2 polarization |
| (17) | RCC | Rev | Proximal | CD3z chain downregulation |
| (18) | Lung ca/melanoma/RCC | Rev | Proximal | PD-1 upregulation |
| (19) | Lung and ovarian ca | Rev | Distal | Treg cells |
| (20) | Lung ca | Rev | ? |  |
| (21) | Melanoma | Rev | Proximal |  |

1. Agrawal S, Marquet J, Delfau-Larue MH, Copie-Bergman C, Jouault H, Reyes F, et al. CD3 hyporesponsiveness and in vitro apoptosis are features of T cells from both malignant and nonmalignant secondary lymphoid organs. J Clin Invest 1998;102:1715-23.

2. Alexander JP, Kudoh S, Melsop KA, Hamilton TA, Edinger MG, Tubbs RR, et al. T-cells infiltrating renal cell carcinoma display a poor proliferative response even though they can produce interleukin 2 and express interleukin 2 receptors. Cancer Res 1993;53:1380-7.

3. Baitsch L, Baumgaertner P, Devevre E, Raghav SK, Legat A, Barba L, et al. Exhaustion of tumor-specific CD8(+) T cells in metastases from melanoma patients. J Clin Invest 2011;121:2350-60.

4. Broderick L, Brooks SP, Takita H, Baer AN, Bernstein JM, Bankert RB. IL-12 reverses anergy to T cell receptor triggering in human lung tumor-associated memory T cells. Clin Immunol 2006;118:159-69.

5. Bronte V, Kasic T, Gri G, Gallana K, Borsellino G, Marigo I, et al. Boosting antitumor responses of T lymphocytes infiltrating human prostate cancers. J Exp Med 2005;201:1257-68.

6. Chapon M, Randriamampita C, Maubec E, Badoual C, Fouquet S, Wang SF, et al. Progressive upregulation of PD-1 in primary and metastatic melanomas associated with blunted TCR signaling in infiltrating T lymphocytes. J Invest Dermatol 2011;131:1300-7.

7. Lai P, Rabinowich H, Crowley-Nowick PA, Bell MC, Mantovani G, Whiteside TL. Alterations in expression and function of signal-transducing proteins in tumor-associated T and natural killer cells in patients with ovarian carcinoma. Clin Cancer Res 1996;2:161-73.

8. Lopez CB, Rao TD, Feiner H, Shapiro R, Marks JR, Frey AB. Repression of interleukin-2 mRNA translation in primary human breast carcinoma tumor-infiltrating lymphocytes. Cell Immunol 1998;190:141-55.

9. Matsuda M, Petersson M, Lenkei R, Taupin JL, Magnusson I, Mellstedt H, et al. Alterations in the signal-transducing molecules of T cells and NK cells in colorectal tumor-infiltrating, gut mucosal and peripheral lymphocytes: correlation with the stage of the disease. Int J Cancer 1995;61:765-72.

10. Matsuzaki J, Gnjatic S, Mhawech-Fauceglia P, Beck A, Miller A, Tsuji T, et al. Tumor-infiltrating NY-ESO-1-specific CD8+ T cells are negatively regulated by LAG-3 and PD-1 in human ovarian cancer. Proc Natl Acad Sci U S A 2010;107:7875-80.

11. Nakagomi H, Petersson M, Magnusson I, Juhlin C, Matsuda M, Mellstedt H, et al. Decreased expression of the signal-transducing zeta chains in tumor-infiltrating T-cells and NK cells of patients with colorectal carcinoma. Cancer Res 1993;53:5610-2.

12. Prinz PU, Mendler AN, Masouris I, Durner L, Oberneder R, Noessner E. High DGK-alpha and disabled MAPK pathways cause dysfunction of human tumor-infiltrating CD8+ T cells that is reversible by pharmacologic intervention. J Immunol 2012;188:5990-6000.

13. Rabinowich H, Banks M, Reichert TE, Logan TF, Kirkwood JM, Whiteside TL. Expression and activity of signaling molecules in T lymphocytes obtained from patients with metastatic melanoma before and after interleukin 2 therapy. Clin Cancer Res 1996;2:1263-74.

14. Reichert TE, Strauss L, Wagner EM, Gooding W, Whiteside TL. Signaling abnormalities, apoptosis, and reduced proliferation of circulating and tumor-infiltrating lymphocytes in patients with oral carcinoma. Clin Cancer Res 2002;8:3137-45.

15. Roussel E, Gingras MC, Grimm EA, Roth JA. High expression of adhesion molecules/activation markers with little interleukin-2, interferon gamma, and tumor necrosis factor beta gene activation in fresh tumor-infiltrating lymphocytes from lung adenocarcinoma. Cancer Immunol Immunother 1995;41:1-9.

16. Sheu BC, Lin RH, Lien HC, Ho HN, Hsu SM, Huang SC. Predominant Th2/Tc2 polarity of tumor-infiltrating lymphocytes in human cervical cancer. J Immunol 2001;167:2972-8.

17. Tartour E, Latour S, Mathiot C, Thiounn N, Mosseri V, Joyeux I, et al. Variable expression of CD3-zeta chain in tumor-infiltrating lymphocytes (TIL) derived from renal-cell carcinoma: relationship with TIL phenotype and function. Int J Cancer 1995;63:205-12.

18. Wang SF, Fouquet S, Chapon M, Salmon H, Regnier F, Labroquere K, et al. Early T cell signalling is reversibly altered in PD-1+ T lymphocytes infiltrating human tumors. PLoS One 2011;6:e17621.

19. Woo EY, Chu CS, Goletz TJ, Schlienger K, Yeh H, Coukos G, et al. Regulatory CD4(+)CD25(+) T cells in tumors from patients with early-stage non-small cell lung cancer and late-stage ovarian cancer. Cancer Res 2001;61:4766-72.

20. Yoshino I, Yano T, Murata M, Ishida T, Sugimachi K, Kimura G, et al. Tumor-reactive T-cells accumulate in lung cancer tissues but fail to respond due to tumor cell-derived factor. Cancer Res 1992;52:775-81.

21. Zippelius A, Batard P, Rubio-Godoy V, Bioley G, Lienard D, Lejeune F, et al. Effector function of human tumor-specific CD8 T cells in melanoma lesions: a state of local functional tolerance. Cancer Res 2004;64:2865-73.
